# Supplementary material for: Inclusion of a suite of weathering tracers in the cGENIE Earth system model – muffin release v.0.9.23
Source: Copernicus journal article supplement (doi:10.5194/gmd-14-4187-2021), 2021-07-05
Supplement: Supplementary file 1 [file gmd-14-4187-2021-supplement.zip]

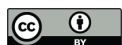

## *Supplement of*

# **Inclusion of a suite of weathering tracers in the cGENIE Earth system model – muffin release v.0.9.23**

**Markus Adloff et al.**

*Correspondence to:* Markus Adloff ([m.adloff@bham.ac.uk](mailto:m.adloff@bham.ac.uk))

- [gmd-14-4187-2021-supplement-title-page.pdf](#)
- [Ca\\_table.xlsx](#)
- [Li\\_table.xlsx](#)
- [Os\\_table.xlsx](#)
- [Sr\\_table.xlsx](#)

The copyright of individual parts of the supplement might differ from the article licence.
